# Supplementary material for: Photo-nanozyme coupling catalyzes glucose oxidation for high-performance enzymatic biofuel cells
Source: Royal Society of Chemistry journal article supplement (doi:10.1039/d4ta04675g), 2024-01-01
Supplement: d4ta04675g1.pdf [file d4ta04675g1.pdf]

## Supporting information

# Photo-nanozyme Coupling Catalyzes Glucose Oxidation for High-performance Enzymatic Biofuel Cells

*Dandan Hu,<sup>1</sup> Qiwen Su,<sup>1</sup> Yan Gao,<sup>1</sup> Jian-Rong Zhang,<sup>1\*</sup> Linlin Wang,<sup>2\*</sup> and Jun-Jie Zhu<sup>1\*</sup>*

<sup>1</sup>State Key Laboratory of Analytical Chemistry for Life Science, School of Chemistry and Chemical Engineering, Nanjing University, Nanjing 210023, P. R. China. E-mail:

[jrzhang@nju.edu.cn](mailto:jrzhang@nju.edu.cn); [jjzhu@nju.edu.cn](mailto:jjzhu@nju.edu.cn)

<sup>2</sup> Shaanxi Key Laboratory of Chemical Additives for Industry, College of Chemistry and Chemical Engineering, Shaanxi University of Science and Technology, Xi'an

710021, China. E-mail: [wanglinlin@sust.edu.cn](mailto:wanglinlin@sust.edu.cn)

# 1 Experimental Section

## 1.1. Materials and Characterization

All chemicals were of analytical grade and were used as purchased without further purification. Fluorine-doped tin oxide (FTO) substrates (F: SnO<sub>2</sub>, < 15 Ω per square) was obtained from Zhuhai Kaivo Optoelectronic Technology Co., Ltd. Bismuth nitrate pentahydrate (Bi (NO<sub>3</sub>)<sub>3</sub>·5H<sub>2</sub>O), glucose, disodium hydrogen phosphate dodecahydrate (Na<sub>2</sub>HPO<sub>4</sub>·12H<sub>2</sub>O), sodium dihydrogen phosphate dihydrate (NaH<sub>2</sub>PO<sub>4</sub>·2H<sub>2</sub>O), nitric acid (HNO<sub>3</sub>, 69%), acetone, ethanol, gold chloride trihydrate (HAuCl<sub>4</sub>·3H<sub>2</sub>O) were purchased from Sinopharm Chemical Reagent Co., Ltd. (China). Vanadyl acetylacetonate (VO (acac)<sub>2</sub>, 99%), 2, 2'-casino-bis (3-ethylbenzothiazoline-6-sulfonic acid) (ABTS), dimethyl sulfoxide (DMSO), polytetrafluoroethylene (PTFE), 1-pyrene butanoic acid succinimidyl ester (PBSE) and p-benzoquinone were obtained from Aladdin Co., Ltd (Shanghai, China). 3,5-dinitro salicylic acid was obtained from Meryer Co., Ltd. Potassium iodide was purchased from Sigma-Aldrich Co., Ltd. Bilirubin oxidase (E.C. 1.3.3.5, from *Myrothecium verrucaria*, activity ≥ 5 U/mg) was obtained from Nanjing Duly Biotechnology Co., Ltd. Nafion perfluorinated resin solution was purchased from Macklin Reagent Co., Ltd. High-purity single-walled carbon nanotubes (SWCNTs) was purchased from Suzhou Tanfeng Tech Reagent Co., Ltd. Carbon cloth was purchased from Suzhou Sinero Technology Co., Ltd. Ultrapure fresh water obtained from a Millipore water purification system (≥ 18 MΩ, Milli-Q, Millipore) was used throughout the whole experiment.

The UV-vis diffuse reflectance spectra were recorded on a spectrophotometer (Shimadzu UV-3600, Japan) with fine BaSO<sub>4</sub> powder as a reference. Fourier-transform infrared (FTIR) spectra were recorded on a Thermo Fisher Nicolet iS50 spectrophotometer. PL emission spectra were measured with an F-7000 spectrophotometer (Hitachi, Japan). Scanning electron microscopy (SEM) images and energy dispersive X-ray spectroscopy (EDS) mapping were obtained by an S-4800 scanning electron microscope (Hitachi Ltd., Japan). X-ray photoelectron spectroscopy (XPS) analysis was performed on a Thermo Scientific K-Alpha using Al K $\alpha$  radiation. X-ray powder diffraction was performed on a Bruker D8 Advance diffractometer (40 kV, 40 mA) with Cu radiation ( $\lambda = 1.54056 \text{ \AA}$ ) at room temperature. The dissolved oxygen meter is AR8010 (smart sensor). Confocal laser scanning microscopy studies were performed using a Leica TCS SP8 microscope (Germany). All electrochemical measurements were performed using an electrochemical workstation (CHI 660 D, Chenhua, China) in a three-electrode system consisting of a platinum wire counter electrode, Ag/AgCl reference electrode, and working electrode. PEC measurements were carried out on an electrochemical workstation (CHI 660 D) at room temperature using a conventional three-electrode cell. The light source was an Xe 300 W lamp (7IPX5002, Beijing Saifan) with an AM 1.5 G filter, and the light intensity at the WE was calibrated to 100 mW cm<sup>-2</sup>. The potential value was recorded by the Ag/AgCl reference electrode, and the Nernst equation was used to convert the applied potential of the Ag/AgCl electrode to the potential of the reversible hydrogen electrode (RHE):

$$E_{\text{RHE}} = E_{\text{Ag/AgCl}} + E_{\text{Ag/AgCl}}(\text{reference}) + 0.0591\text{V} \times \text{pH}$$

where RHE E refers to the converted potential versus RHE. The value of  $E_{\text{Ag/AgCl}}(\text{reference})$  is 0.1976 V at ambient temperature (25 °C) and  $E_{\text{Ag/AgCl}}$  is the obtained potential versus Ag/AgCl.

## 1.2. Preparation of the electrodes

***Pretreatment of the FTO:*** In order to remove impurities such as grease and dust from the surface of the FTO, a sequential cleaning process was performed. FTO was sequentially placed in acetone, absolute ethanol and deionized water for ultrasonic 30 min, and the clean FTO was dried by nitrogen for further use.

***Pretreatment of the carbon cloth:*** The carbon cloth was cut into 1 cm × 1.5 cm, cleaned with ethanol and deionized water three times, and dried in an oven at 40 °C.

***Carbon nanotube substrate (SWCNT film) fabrication:*** Grinding SWCNT was mixed with 30% PTFE emulsion to control the mass ratio of SWCNT to PTFE was 85:15, which was rolled out into SWCNT film and set aside. The mass loading of the carbon nanotube film was 0.6 mg cm<sup>-2</sup>.

## 1.3 X-ray diffraction for Au/BiVO<sub>4</sub>/Si

In order to distinguish the substrate peak of FTO (37.76°) from the Au (111) (38.18°) crystal plane, Au/BiVO<sub>4</sub> was ultrasonically exfoliated from the FTO substrate and dropped onto the silicon wafer to confirm the existence of the Au (111) crystal plane peak.

## 1.4 Mott-Schottky analysis

The Mott-Schottky curve (M-S) test is an important means of characterizing the flat band potential ( $E_{\text{fb}}$ ) as well as the carrier concentration ( $N_{\text{d}}$ ). The slope of the

Mott-Schottky curve can be used to estimate the carrier concentration and is calculated as follows<sup>1</sup>:

$$N_d = \frac{2}{e\epsilon\epsilon_0} \left\{ \frac{d\left(\frac{1}{C^2}\right)}{dV} \right\}^{-1}$$

Where  $e$  represents the electronic charge, with a value of  $1.6 \times 10^{-19}$  C,  $\epsilon$  is the dielectric constant of the semiconductor, and BiVO<sub>4</sub> semiconductor material has a value of 68,  $\epsilon_0$  is the vacuum dielectric constant, which is  $8.854 \times 10^{-12}$  F/m,  $C$  is the space charge capacitance,  $V$  is the applied voltage, and  $d(1/C^2)/dV$  is the slope of the Mott Schottky diagram. Additionally, the flat band potential ( $E_{fb}$ ) can be derived by extrapolating the X-intercept within the linear region of the M-S diagram<sup>2</sup>.

### 1.5 Calculation of $E_{CB}$ , $E_{VB}$

We can calculate the conduction band energy ( $E_{CB}$ ) of the semiconductor according to Formula 1 based on the flat band potential value obtained by the M-S curve.<sup>3</sup>

$$E_{CB} = E_{fb} - 0.2 \quad (1)$$

Consequence, utilizing following Formula 2, we computed the respective valance band energy ( $E_{VB}$ ) of the catalyst.

$$E_{VB} = E_g + E_{CB} \quad (2)$$

### 1.6 Glucose assay

The glucose concentration in the solution was determined using the 3,5-dinitrosalicylic acid (DNS) method<sup>4</sup>. Under alkaline conditions, the DNS reagent reacts with reducing sugar to produce brown-red 3-amino-5-nitrosalicylic acid. Within

a particular range, the depth of brown-red is related to the amount of reducing sugar in the sample. DNS (0.65 g) was dissolved in a small amount of hot water, then 2 mol/L NaOH (32.5 mL), propanetriol (4.5 g) was added, and finally, the solution was fixed to 100 mL with a secondary water. The above solution was stored in a brown bottle in a dark place for use.

For glucose assay, 600  $\mu\text{L}$  of DNS reagent was added to 200  $\mu\text{L}$  standard or sample, and the reaction was carried out at 95  $^{\circ}\text{C}$  for 5 min. The reaction was blocked by cold water, and the assay was completed in 10 min using a microplate reader.

### **1.7 Kinetic study of the photoelectrochemical oxidation for glucose**

Glucose photoelectrochemical oxidation was carried out in a customized quartz electrolytic cell containing 10 mL of 2 mM glucose solution with 0.2 M PB (pH 7.4) as the supporting electrolyte. A typical three-electrode system was assembled using the prepared Au,  $\text{BiVO}_4$  and Au/ $\text{BiVO}_4$  electrode (working area 2  $\text{cm}^2$ ) as the working electrode, Ag/AgCl (3 M KCl) as the reference electrode, and Pt wire as the counter electrode. A Xe lamp (Saifan optoelectronic) with an optical filter ( $420 \text{ nm} \leq \lambda \leq 780 \text{ nm}$ ) was employed as the light irradiation source. Prior to decomposition, the glucose solution was stirred for 30 min in the dark to achieve an adsorption-desorption balance. For the oxidation of glucose, we applied a constant voltage of 0.3 V and took samples at hourly intervals, ending the reaction after 6 hours.

### **1.8 The measurement of dissolved oxygen**

$\text{O}_2$  produced in the photocatalytic water decomposition reaction was recorded by a portable dissolved oxygen meter. The dissolved oxygen meter was placed in a

sealed quartz cell under light and  $O_2$  concentrations were recorded at regular intervals in the PB buffer containing glucose or not.

### **1.9 The test of electrochemical impedance spectroscopy (EIS)**

The electrolyte for the EIS tests was a solution containing 0.5 M potassium ferricyanide and 0.5 M potassium ferrocyanide. A three-electrode system was employed, with either a  $BiVO_4$  or  $Au/BiVO_4$  photoanode as the working electrode, a platinum wire as the counter electrode, and an  $Ag/AgCl$  reference electrode. The frequency range was set from 0.01 Hz to 100 kHz, with an amplitude of 5 mV.

## 2 Supporting Figures

Figure S1

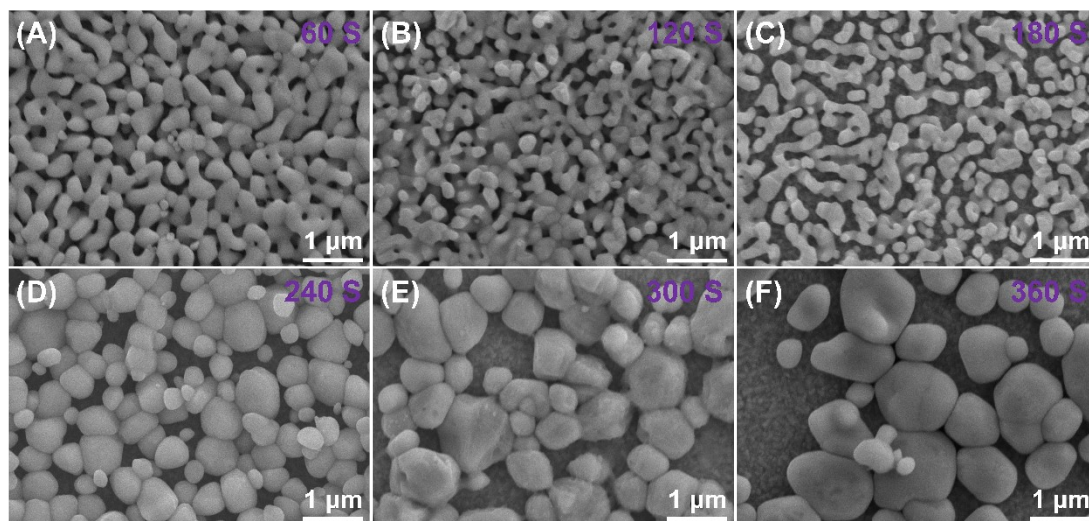

**Fig. S1.** SEM images of BiVO<sub>4</sub> obtained by different electrodeposition time for BiOI

(A) 60 s, (B) 120 s, (C) 180 s, (D) 240 s, (E) 300 s, (F) 360 s.



Figure S2

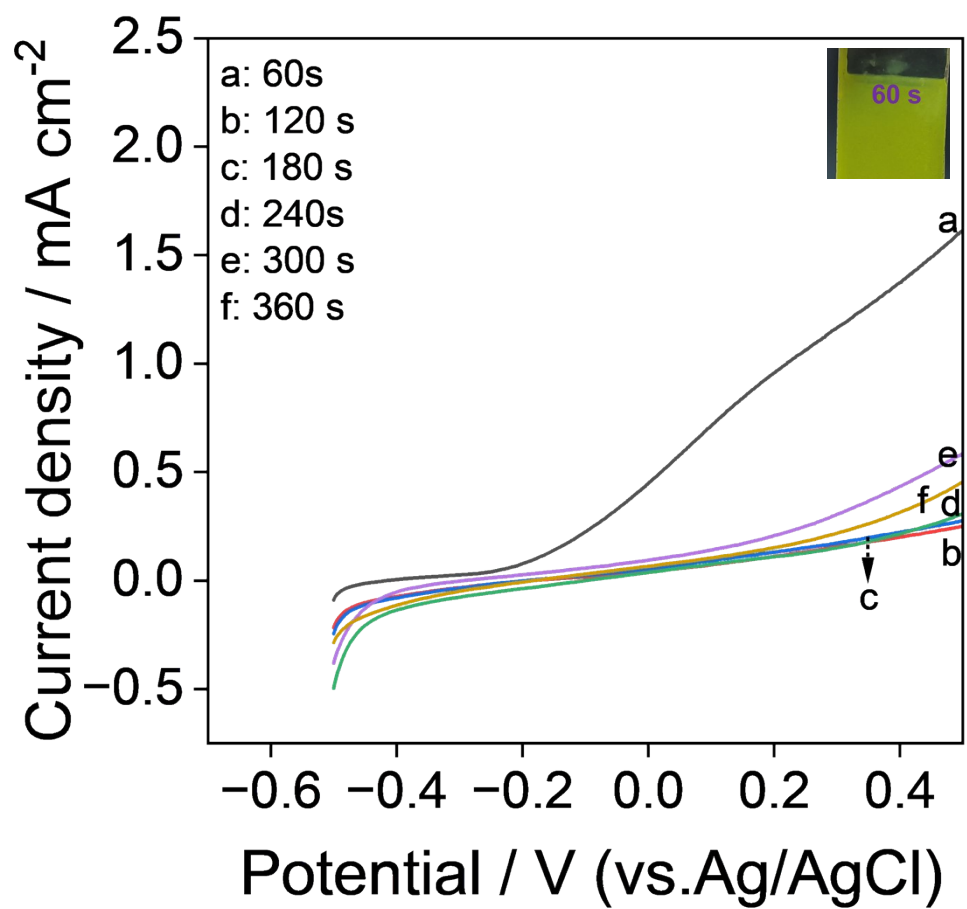

**Fig. S2.** LSV response of BiVO<sub>4</sub> synthesized by different electrodeposition times in 0.2 M PB (pH 7.4) containing 200 mM glucose. All LSVs are scanned at 50 mV s<sup>-1</sup>.

Figure S3

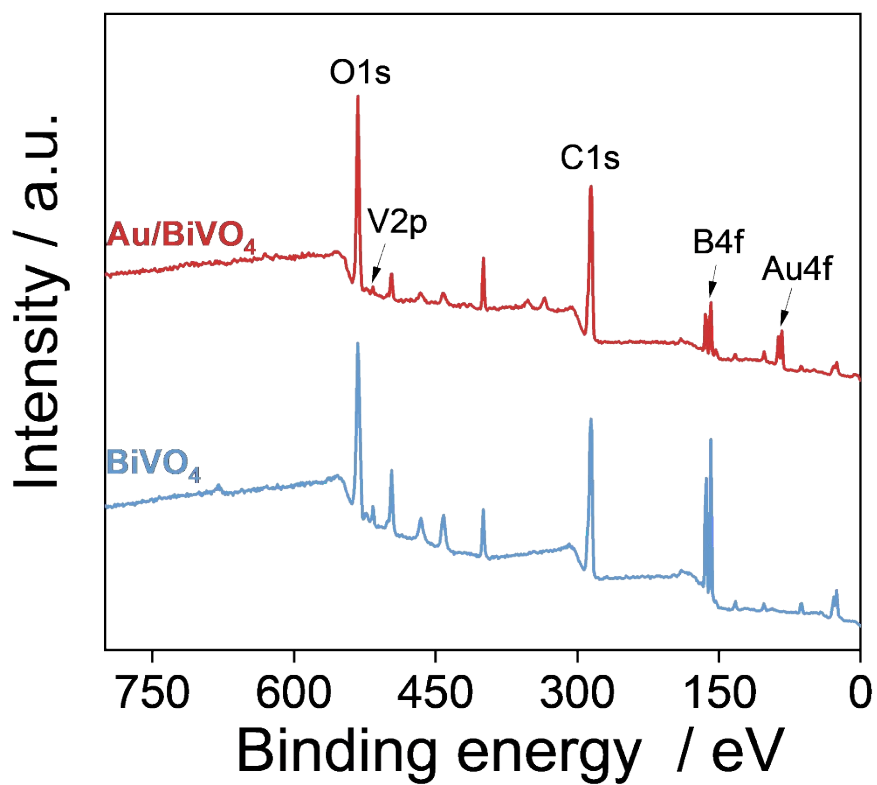

Fig. S3. XPS spectra of BiVO<sub>4</sub>, Au/BiVO<sub>4</sub>.

**Figure S4**

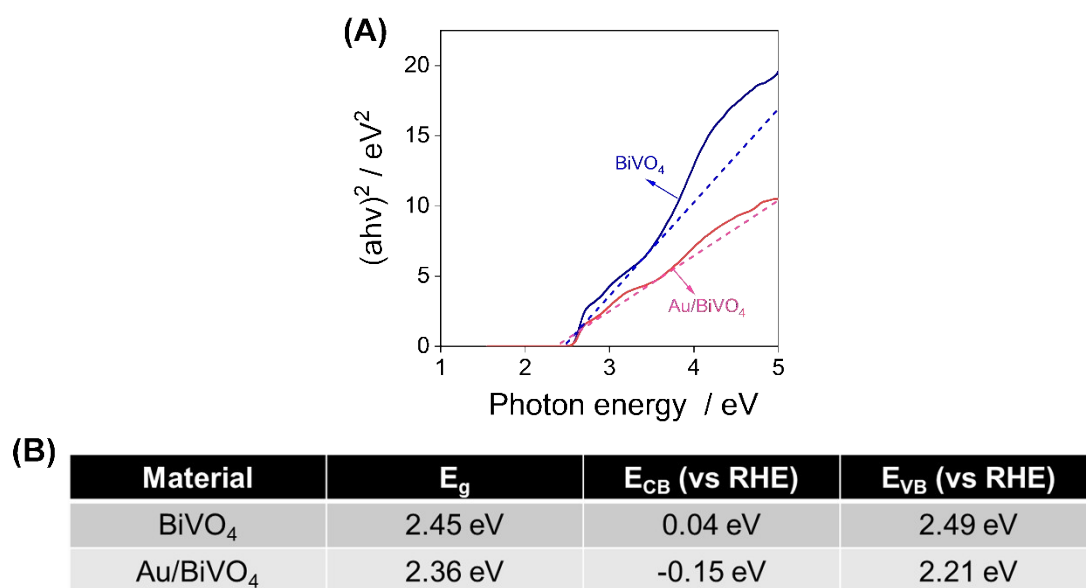

**Fig. S4.** (A) Tauc plots and (B) band gap ( $E_g$ ), valence band ( $E_{VB}$ ) and conduction band ( $E_{CB}$ ) data of  $\text{BiVO}_4$ ,  $\text{Au/BiVO}_4$ .

**Figure S5**

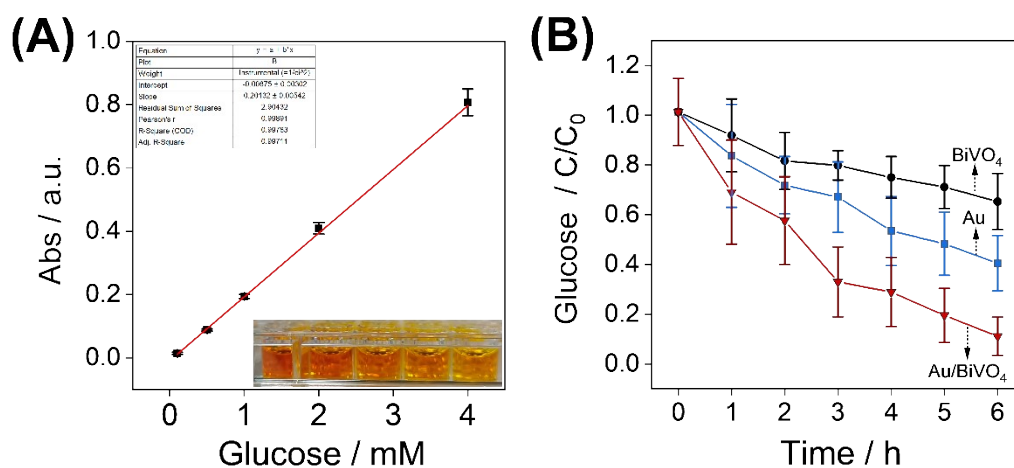

**Fig. S5.** (A) Calibration curve for the UV-Vis absorbance at 530 nm wavelength of DNS solution in the concentration ranging from 0 to 4 mM. (B) Au,  $\text{BiVO}_4$  and  $\text{Au/BiVO}_4$  electrode for glucose oxidase at 0.3 V.

Figure S6

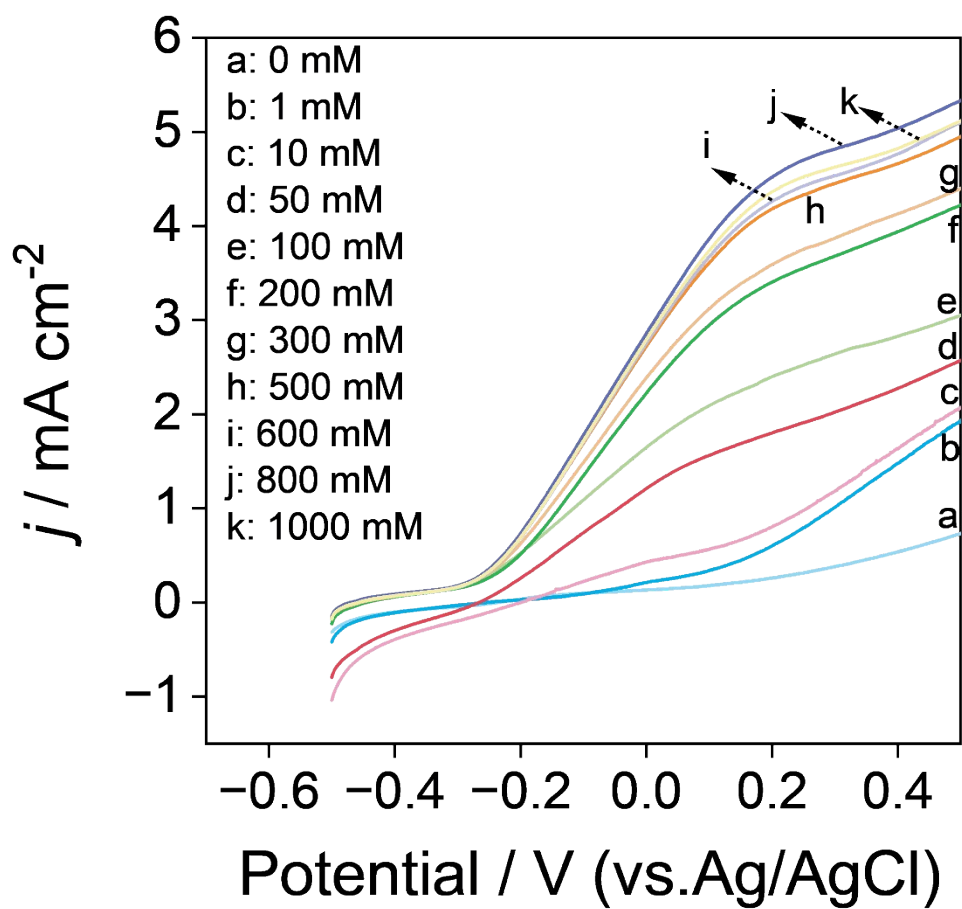

**Fig. S6.** LSV curves of Au/BiVO<sub>4</sub> electrode measured in 0.2 M PB (pH 7.4) with different glucose concentrations. All LSVs are scanned at 50 mV s<sup>-1</sup>.

Figure S7

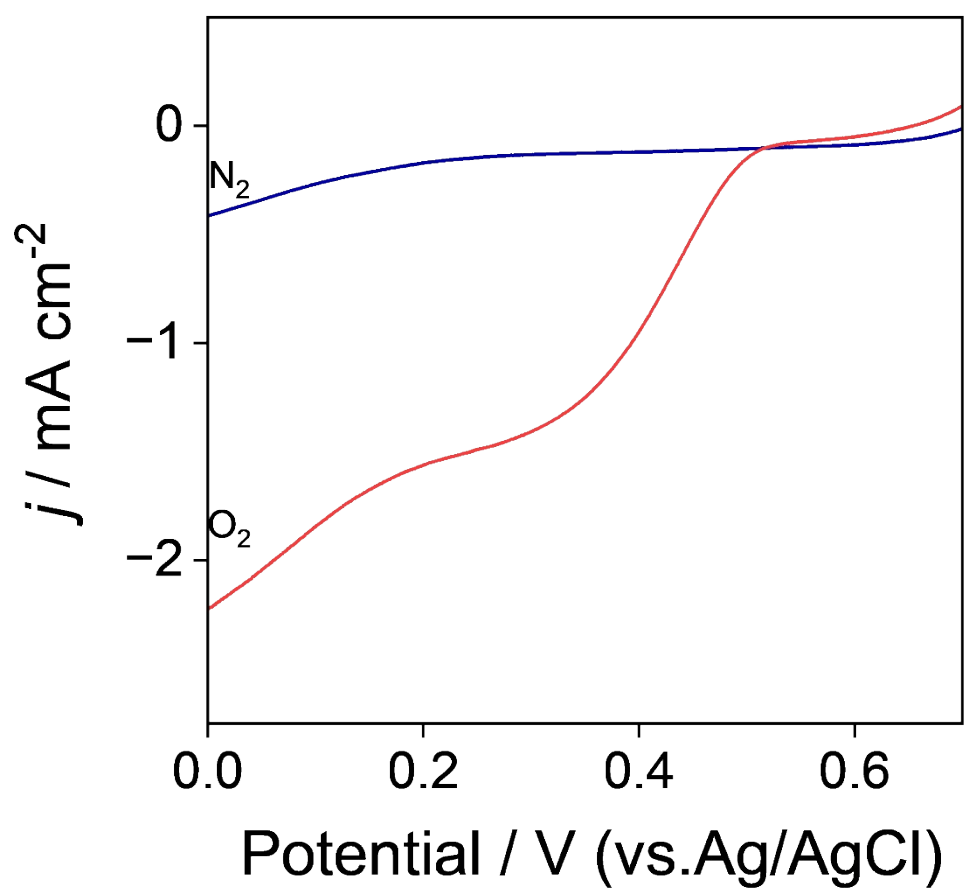

**Fig. S7.** LSVs of the BOD/SWCNT biocathode in 0.2 M PB (pH = 7.4) saturated with  $\text{N}_2$  (blue curve) and  $\text{O}_2$  (red curve). All LSVs are scanned at  $50 \text{ mV s}^{-1}$ .

Figure S8

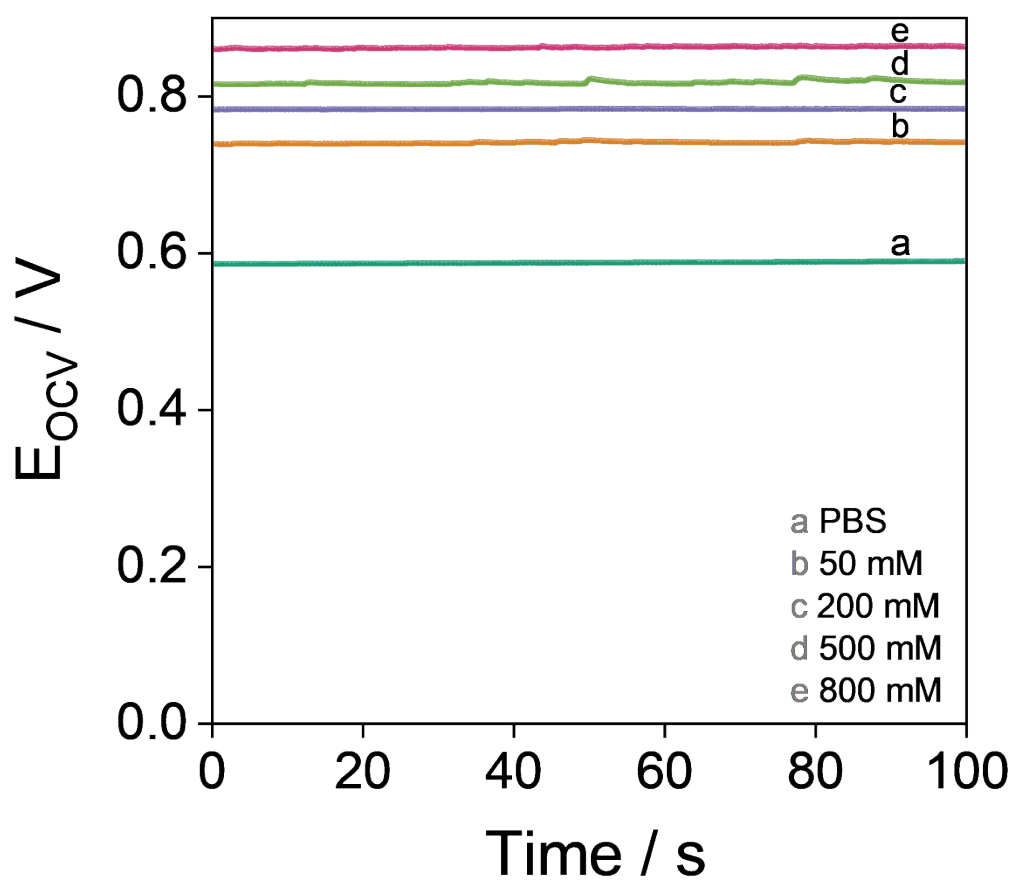

**Fig. S8.** The  $E_{ocv}$  of the GBFC with irradiation correspond to glucose concentrations of 0, 50, 200, 500, and 800 mM.

**Figure S9**

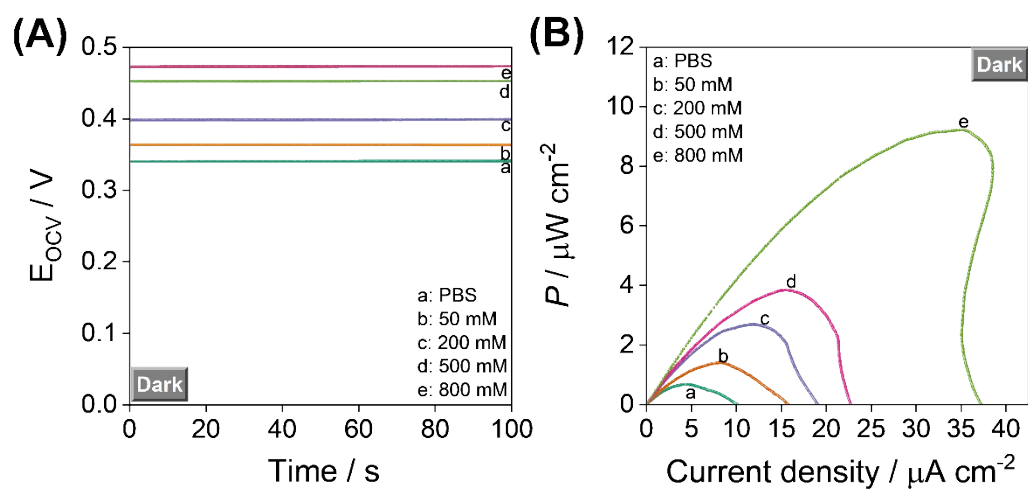

**Fig. S9.** (A)  $E_{ocv}$  and (B) power densities of the GBFC without irradiation corresponding to 0, 50, 200, 500 and 800 mM glucose. Scan rate:  $1 \text{ mV s}^{-1}$ .

**Figure S10**

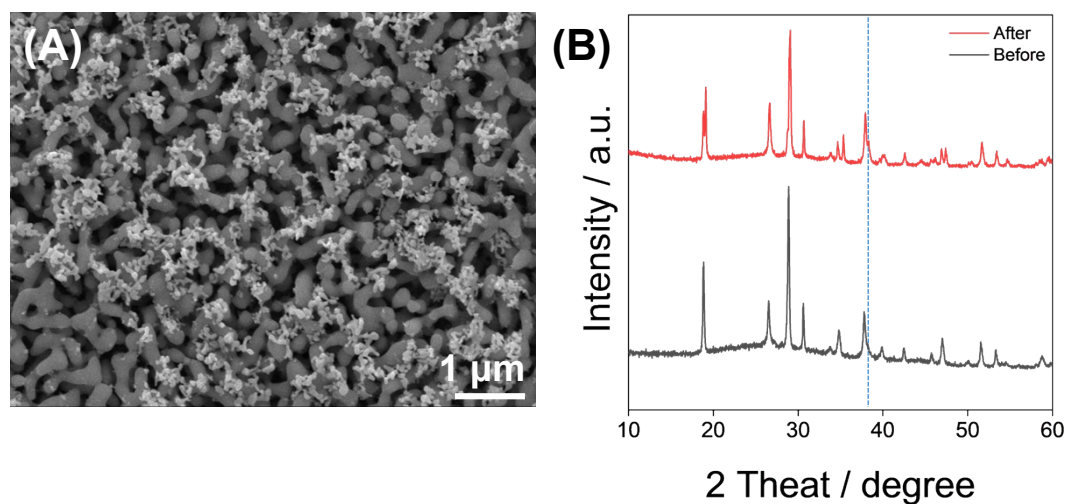

**Fig. S10.** (A) XRD and (B) SEM images of anodic Au/BiVO<sub>4</sub> after GBFC discharge for 20 h.

### 3 Supporting Tables

**Table S1**

Glucose/O<sub>2</sub> fuel cell anode performance comparison under a neutral environment

| Anode                         | Electrolyte        | Glucose oxidation current (0.5 V) | Glucose concentration | References                                         |
|-------------------------------|--------------------|-----------------------------------|-----------------------|----------------------------------------------------|
| Rhodium single-atom (Rh SANs) | PBS (0.1 M pH 7.4) | 1.75 mA cm <sup>-2</sup>          | 100 mM                | ACS Energy Lett., 2023, 8, 1697-1704               |
| CuO/MWCNTs-PEDOT: PSS         | PBS (0.1 M pH 7.4) | ≈ 0.012 mA                        | 10 mM                 | Adv. Mater., 2023, 35, 2300890                     |
| Pt Nanoflowers (Pt NFs)       | PBS (0.1 M pH 7.4) | 3 mA cm <sup>-2</sup>             | 5 mM                  | ACS Appl. Mater. Interfaces, 2023, 15, 17969-17977 |
| PdAuNS/f-CNT/SPCE             | PBS (0.1 M pH 7.4) | ≈ 0.8 mA                          | 20 mM                 | Biosens. Bioelectron., 2022, 210, 114335           |
| Pt/Au nano-alloy/Pt@PETE      | PBS (0.1 M pH 7.4) | ≈ 0.2 mA                          | 5 mM                  | J. Power Sources, 2021, 486, 229374                |
| AuNWs/GCE                     | PBS (0.1 M pH 7.4) | ≈ 0.15 mA cm <sup>-2</sup>        | 30 mM                 | Biosens. Bioelectron., 2014, 52, 105-110           |
| Al/Au/ZnO                     | PBS (0.1, pH 7.4)  | ≈ 0.1 mA                          | 25 mM                 | J. Power Sources, 2014, 261, 332-336               |
| AuNW                          | PBS (0.1 M pH 7.4) | ≈ 0.4 mA cm <sup>-2</sup>         | 5 mM                  | Energy Environ. Sci., 2013, 6, 3600-3604           |
| Pt-Au alloy nanoparticles     | PBS (0.1 M pH 7.4) | ≈ 0.7 mA cm <sup>-2</sup>         | 100 mM                | J. Phys. Chem. B, 2007, 111, 10329                 |
| Au/BiVO <sub>4</sub>          | PB (0.2 M pH 7.4)  | 5.33 mA cm <sup>-2</sup>          | 800 mM                | This work                                          |



**Table S2**

Performance comparison of glucose/O<sub>2</sub> biofuel cells based on glucose oxidase (GOD  
or GOx) anodes

| Anode                                              | Cathode                            | Electrolyte conditions                        | Performance                                                              | Reference                                          |
|----------------------------------------------------|------------------------------------|-----------------------------------------------|--------------------------------------------------------------------------|----------------------------------------------------|
| Ti <sub>3</sub> C <sub>2</sub> Tx/MWCNTs/AuNPs/GOx | ZnCo <sub>2</sub> @NCNT            | 0.1 M PBS containing 5 mM glucose             | Stability: N/A; Eocv = 0.497 V; Pmax = 61.34 μW cm <sup>-2</sup>         | Small, 2023, 19, 2206257                           |
| BP/[TTF-GOx]/Gelatin-GA                            | BP/4-APA/BOD                       | 0.01 M PBS (pH 7.0) containing 0.01 M glucose | Stability: N/A; Eocv = 0.61 V; Pmax = 92 μW cm <sup>-2</sup>             | Appl. Energ., 2023, 339, 120978                    |
| GRE/PPD/(AuNPs)PPCA-GOx                            | GRE/PB-PPCA/PPCA-GOx               | APS-KCl (pH 6.0) containing 40 mM glucose     | Stability: 36 days, 90%; Eocv = 0.63 V; Pmax = 10.94 μW cm <sup>-2</sup> | Biosens. Bioelectron., 2022, 216, 114657           |
| GOx/rGO/FP                                         | Lac/rGO/FP                         | 0.01M PBS (pH 7.4) containing 40 mM glucose   | Stability: N/A; Eocv = 0.04 V; Pmax = 4.0 nW cm <sup>-2</sup>            | ACS Appl. Mater. Interfaces, 2022, 14, 24229-24244 |
| GR/PB-PPCA/PPCA-GOx                                | GR/PB-PPCA/PPCA-GOx                | A-PBS-KCl (pH 6.0) containing 10 mM glucose   | Stability: 14 days, 95%; Eocv = 0.15 V; Pmax: N/A                        | Sci. Rep., 2021, 11, 18568                         |
| GOx/[FeCo-OMPC/CNT]                                | FeCo-OMPC                          | 0.02 mM PBS (pH 7.4) containing 30 mM glucose | Stability: N/A; Eocv = N/A; Pmax = 1.2 μW cm <sup>-2</sup>               | Appl. Surf. Sci., 2020, 511, 145449                |
| NPG/Os(bpy)PVI/GOx                                 | CPG/RGO-A/BOD                      | 0.1 M PBS (pH 7.0) containing 20 mM glucose   | Stability: N/A; Eocv = 0.51 V; Pmax = 22 μW cm <sup>-2</sup>             | Biosens. Bioelectron., 2020, 167, 112500           |
| GOx/Porous structured carbon paper                 | Lac/Porous structured carbon paper | 0.1 M PBS (pH 7.4) containing 5 mM glucose    | Stability: 2000 s, 75%; Eocv = 0.60 V; Pmax = 9.64 μW cm <sup>-2</sup>   | J. Mater. Chem. B, 2020, 8, 3550-3556              |

|                                              |                                              |                                                   |                                                                                        |                                                    |
|----------------------------------------------|----------------------------------------------|---------------------------------------------------|----------------------------------------------------------------------------------------|----------------------------------------------------|
| GOx/Cross-linking of chitosan and genipin    | Lac                                          | 0.01 M PBS (pH7.4) containing 20 mM glucose       | Stability: N/A;<br>Eocv = 0.54 V; Pmax = 38 $\mu\text{W cm}^{-2}$                      | ACS Appl. Mater. Interfaces, 2020, 12, 23635-23643 |
| RPPy/GOx                                     | Lac                                          | acetate buffer (pH 5.0) containing 0.05 M glucose | Stability: N/A;<br>Eocv = 1.16 V;<br>Pmax = 350 $\mu\text{W cm}^{-2}$                  | Biosens. Bioelectron., 2019, 132, 76-83            |
| MGCE/Fe <sub>3</sub> O <sub>4</sub> -RGO/GOx | MGCE/Fe <sub>3</sub> O <sub>4</sub> -RGO/BOD | 0.1 M PBS (pH 7.0) containing 5 mM glucose        | Stability: N/A; Eocv = 0.626 V; Pmax = 73.7 $\mu\text{W cm}^{-2}$                      | Sci. Rep., 2017, 7, 12882                          |
| Au/BiVO <sub>4</sub>                         | BOD                                          | PB (0.2 M, pH = 7.4) with 800 mM glucose          | Stability 20 h, 80 %;<br>Eocv = 0.86 V;<br>Pmax = 575 $\mu\text{W}\cdot\text{cm}^{-2}$ | This work                                          |

**Table S3**

Performance comparison of glucose oxygen biofuel cells based on photoelectrocatalytic anodes

| Anode                                 | Cathode                                                           | Electrolyte conditions                                                   | Performance                                                                           | Reference                                          |
|---------------------------------------|-------------------------------------------------------------------|--------------------------------------------------------------------------|---------------------------------------------------------------------------------------|----------------------------------------------------|
| BiVO <sub>4</sub>                     | Hemin/BP                                                          | 0.1M PBS (pH 7.0) with 10 mM glucose                                     | Stability 12 h;<br>Eocv = 0.62 V;<br>Pmax = 139.17 $\mu\text{W}\cdot\text{cm}^{-2}$   | Appl. Catal. B-Environ. Energy, 2024, 343, 123481. |
| TiO <sub>2</sub> /TCPP/GDH            | MCHS/CP                                                           | Tris-HCl (0.25 M, pH 8.0) + NAD <sup>+</sup> (10 mM) with 120 mM glucose | Stability 3 h, 73%; Eocv = 0.76 V; Pmax = 240 $\mu\text{W}\cdot\text{cm}^{-2}$        | J. Mater. Chem. A, 2023, 11, 600-608.              |
| Mo: BiVO <sub>4</sub>                 | GOD/PB                                                            | 0.1 M PB (pH 6.0) containing 60 mM glucose                               | Stability: N/A;<br>Eocv = 0.508 V;<br>Pmax = 170.35 $\mu\text{W}\cdot\text{cm}^{-2}$  | Nano Energy, 2022, 104, 107940.                    |
| BiVO <sub>4</sub>                     | Pt                                                                | 0.2 M NaBi containing 20 mM glucose                                      | Stability: N/A;<br>Eocv = 0.56 V;<br>Pmax = 24.9 $\mu\text{W}\cdot\text{cm}^{-2}$     | Electroanal. Chem., 2021, 882, 114912              |
| TiO <sub>2</sub> -PbS QD/Os CP/GDH    | GOx/PEI/BiFeO <sub>3</sub>                                        | PBS (0.05 M, pH = 7.0) with 100 mM glucose                               | Stability 20 min, 70%;<br>Eocv = 1.0 V;<br>Pmax = 10 $\mu\text{W}\cdot\text{cm}^{-2}$ | Angew. Chem. Int. Ed., 2021, 60, 2078-2083.        |
| Fe <sub>2</sub> O <sub>3</sub>        | Pt                                                                | 1 M NaOH containing 2.5 mM glucose                                       | Stability: N/A;<br>Eocv = N/A;<br>Pmax = 8.0 $\mu\text{W}\cdot\text{cm}^{-2}$         | Sensors & Actuat. B. Chem., 2020, 310, 127842.     |
| TNA/A-g-C <sub>3</sub> N <sub>4</sub> | CBFeO (Fe <sup>3+</sup> -doped CuBi <sub>2</sub> O <sub>4</sub> ) | 0.1 M PB (pH 7.4) containing 10 mM glucose                               | Stability: N/A;<br>Eocv = 0.98 V;<br>Pmax = 133.5 $\mu\text{W}\cdot\text{cm}^{-2}$    | Biosens. Bioelectron., 2020, 165, 112357.          |
| AuNP/g-C <sub>3</sub> N <sub>4</sub>  | BOD                                                               | 0.1 M PB (pH 7.4) containing 0.1 M glucose                               | Stability: N/A;<br>Eocv = 0.508 V;<br>Pmax = N/A                                      | J. Mater. Chem. B, 2019,7, 2277-2283.              |
| Au-TiO <sub>2</sub> NRAs              | pTTh-Cu <sub>2</sub> O                                            | 0.1 M (PBS) (pH 7.0) containing 50 mM glucose                            | Stability: 8 h, 40%;<br>Eocv = 0.78 V; Pmax = 130 $\mu\text{W}\cdot\text{cm}^{-2}$    | Appl. Catal. B-Environ. Energy, 2019, 250, 171-180 |

|                                           |                     |                                                                         |                                                                           |                                       |
|-------------------------------------------|---------------------|-------------------------------------------------------------------------|---------------------------------------------------------------------------|---------------------------------------|
| TiO <sub>2</sub>                          | Pt                  | 1 M NaOH containing 0.05 mM glucose                                     | Stability: N/A;<br>Eocv = N/A;<br>Pmax = 140 μW cm <sup>-2</sup>          | Electrochem. Commun., 2018, 94, 18-22 |
| W: BiVO <sub>4</sub>                      | pTTh                | sodium borate containing 0.10 M glucose                                 | Stability: 20 h, 50%<br>Eocv = 0.62 V;<br>Pmax = 82 μW cm <sup>-2</sup>   | ChemSusChem., 2017, 10, 99-105        |
| Ni(OH) <sub>2</sub> /CdS/TiO <sub>2</sub> | hemin-graphene (HG) | 0.1 M PB (pH 7.4) containing 500 μM glucose                             | Stability: N/A;<br>Eocv = N/A;<br>Pmax = 28 μW cm <sup>-2</sup>           | Anal. Chem. 2016, 88, 12, 6140-6144   |
| TiO <sub>2</sub>                          | Pt wire             | 0.1 M Na <sub>2</sub> SO <sub>4</sub> (pH 5.9) containing 10 mM glucose | Stability: N/A;<br>Eocv = 0.57 V;<br>Pmax = 4.81 μW cm <sup>-2</sup>      | Chem. Commun., 2013, 49, 8632-8634    |
| Au/BiVO <sub>4</sub>                      | BOD                 | PB (0.2 M, pH = 7.4) with 800 mM glucose                                | Stability 20 h, 80 %;<br>Eocv = 0.86 V;<br>Pmax = 575 μW·cm <sup>-2</sup> | This work                             |

#### 4. Supplementary References

1. S. Qu, H. Wu and Y. H. Ng, *Small*, 2023, **19**, 2300347.
2. H. Wang, R. Gao, N. T. Nguyen, J. Bai, S. Ren, X. Liu, X. Zhang and L. Wang, *ACS Nano*, 2023, **17**, 22071-22081.
3. L. Gao, Y. Zhou, L. Cao, X. Cui, Y. Zheng, H. Yin and S. Ai, *Anal. Chem.*, 2022, **94**, 16936-16944.
4. Y. Li, R. Fu, Z. Duan, C. Zhu and D. Fan, *Small*, 2022, **18**, 2200165.
